# Supplementary material for: Circulating MicroRNA-92b-3p as a Novel Biomarker for Monitoring of Synovial Sarcoma
Source: PubMed Central journal article supplement (PMC5676745; doi:10.1038/s41598-017-12660-5), 2017-11-07
Supplement: 41598_2017_12660_MOESM1_ESM.pdf [file 41598_2017_12660_MOESM1_ESM.pdf]

## Supplementary information

### **Circulating *MicroRNA-92b-3p* as a Novel Biomarker for Monitoring of Synovial Sarcoma**

Koji Uotani<sup>1</sup>, Tomohiro Fujiwara<sup>1,2</sup>, Aki Yoshida<sup>1</sup>, Shintaro Iwata<sup>3</sup>, Takuya Morita<sup>1</sup>, Masahiro Kiyono<sup>1</sup>, Suguru Yokoo<sup>1</sup>, Toshiyuki Kunisada<sup>4</sup>, Ken Takeda<sup>5</sup>, Joe Hasei<sup>1</sup>, Kunihiro Numoto<sup>6</sup>, Yutaka Nezu<sup>7</sup>, Tsukasa Yonemoto<sup>3</sup>, Takeshi Ishii<sup>3</sup>, Akira Kawai<sup>8</sup>, Takahiro Ochiya<sup>7</sup>, Toshifumi Ozaki<sup>1</sup>

<sup>1</sup>Department of Orthopaedic Surgery, Okayama University Graduate School of Medicine, Dentistry, and Pharmaceutical Sciences

<sup>2</sup>Center of Innovative Medicine, Okayama University Hospital

<sup>3</sup>Department of Orthopaedic Surgery, Chiba Cancer Center

<sup>4</sup>Department of Medical Materials for Musculoskeletal Reconstruction, Okayama University Graduate School of Medicine, Dentistry, and Pharmaceutical Sciences

<sup>5</sup>Department of Intelligent Orthopaedic System, Okayama University Graduate School of Medicine, Dentistry, and Pharmaceutical Sciences

<sup>6</sup>Department of Orthopaedic Surgery, Kochi Health Sciences Center

<sup>7</sup>Division of Molecular and Cellular Medicine, National Cancer Center Research Institute

<sup>8</sup>Department of Musculoskeletal Oncology, National Cancer Center Hospital

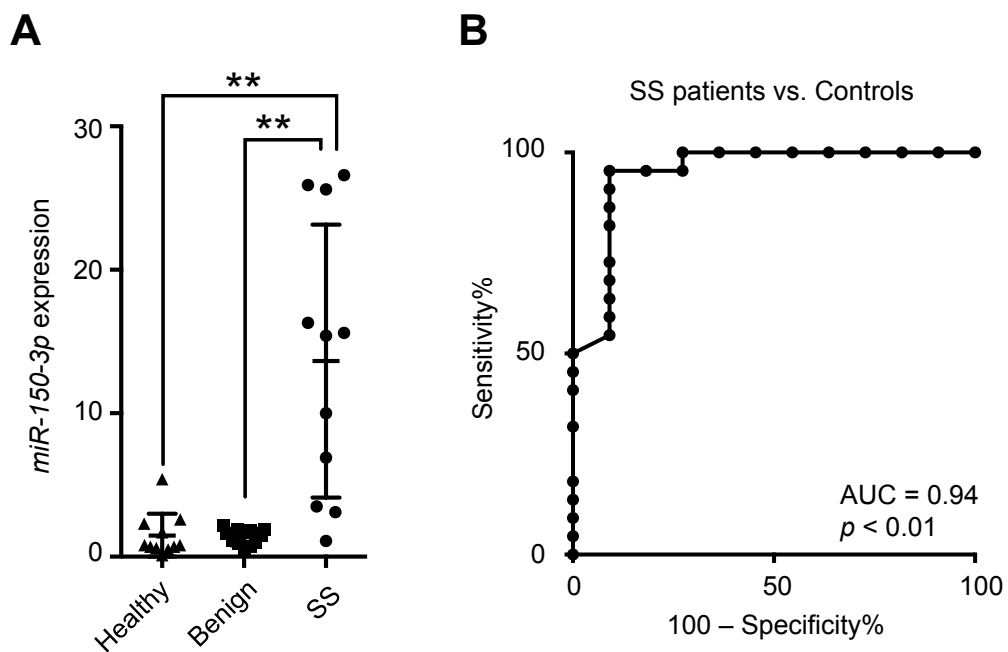

**Supplementary Figure S1. Serum *miR-150-3p* expression levels in the validation cohort.** (A) Serum *miR-150-3p* expression levels in SS patients, age-matched benign tumor patients, and control individuals in the validation cohort ( $p < 0.01$ ).  $**p < 0.01$ ; one-way ANOVA with Holm-Sidak's multiple comparison test. (B) Receiver-operating characteristics curve analysis indicated the AUC of 0.94 (95% confidence interval = 0.86 – 1.0)

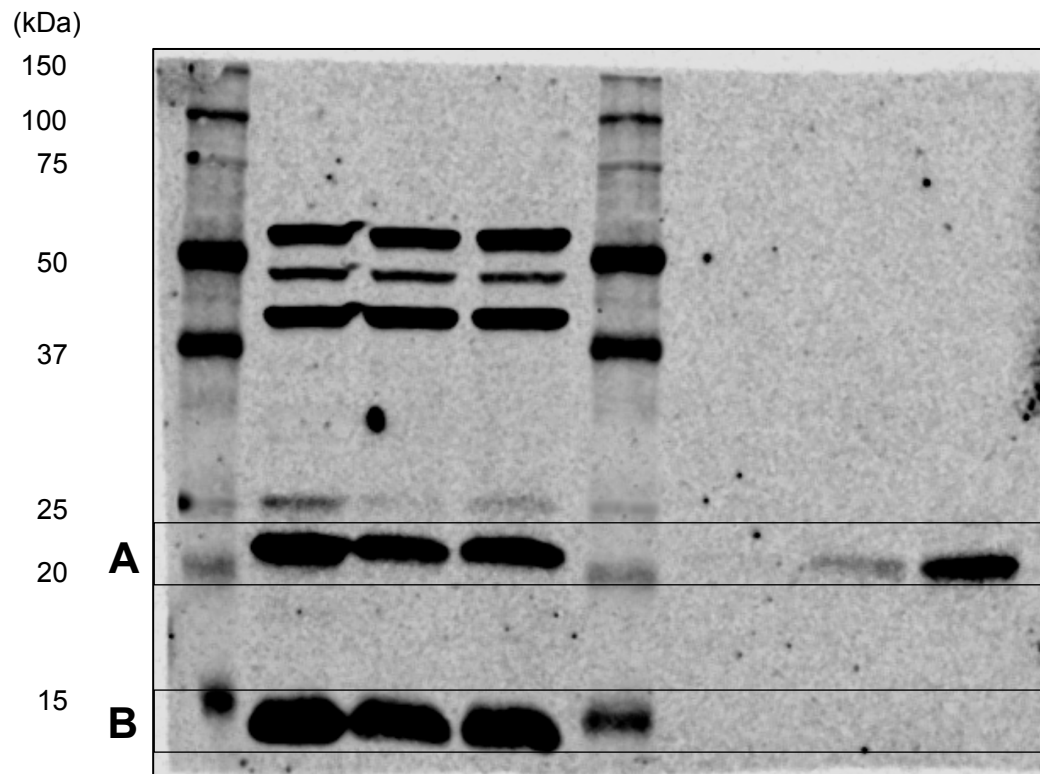

Supplementary Figure S2. Full-length blots shown in Figure 5C. (A) CD9. (B) Cytochrome-C.

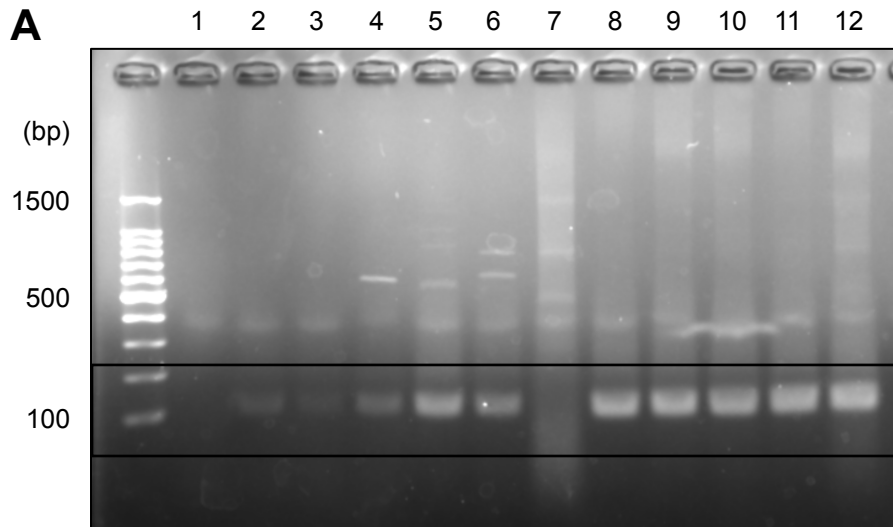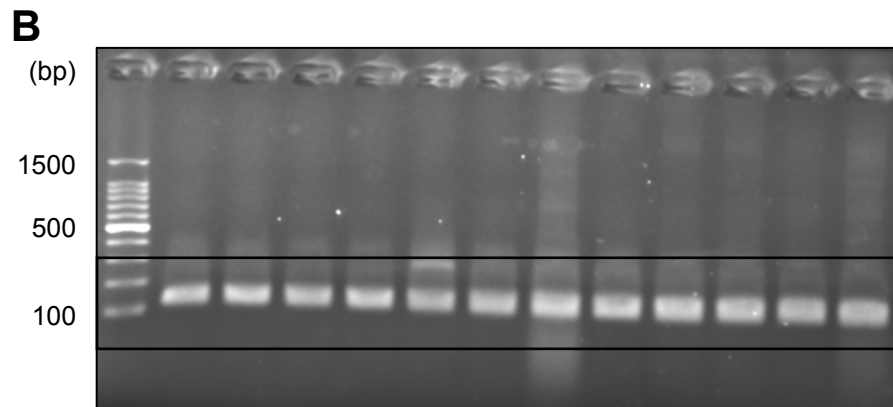

| Lane No. | Type of samples | Cell lines |
|----------|-----------------|------------|
| 1        |                 | HT1080     |
| 2        |                 | SYO-1      |
| 3        | Exosome         | HS-SY-II   |
| 4        |                 | YaFuSS     |
| 5        |                 | Yamato-SS  |
| 6        |                 | Aska-SS    |
| 7        |                 | HT1080     |
| 8        |                 | SYO-1      |
| 9        | Cells           | HS-SY-II   |
| 10       |                 | YaFuSS     |
| 11       |                 | Yamato-SS  |
| 12       |                 | Aska-SS    |

Supplementary Figure S3. Full-length gels shown in Figure 5D. (A) *SS18-SSX*. (B) *GAPDH*.

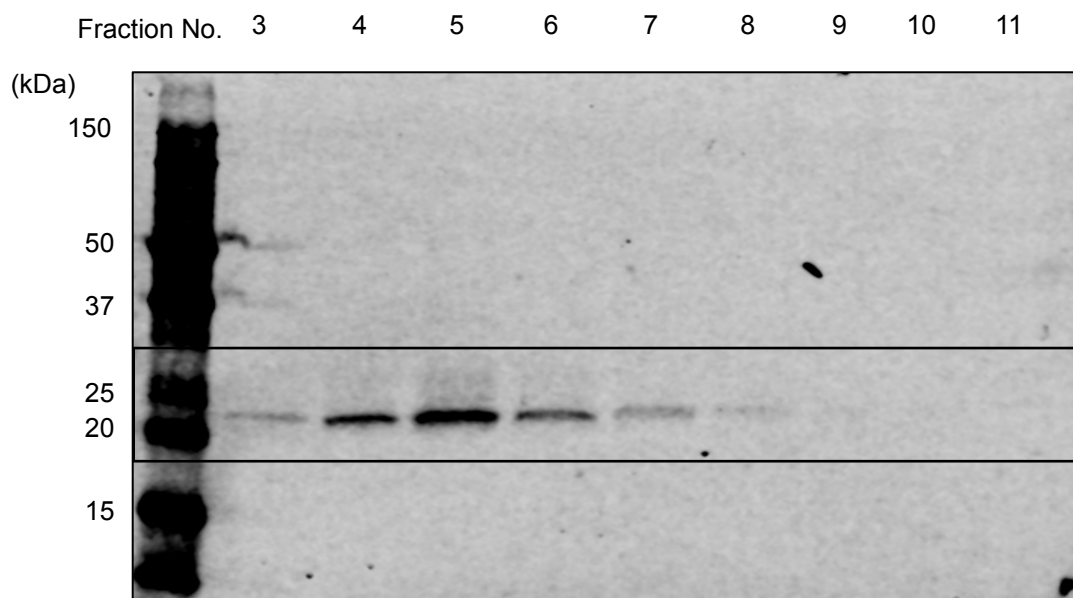

Supplementary Figure S4. Full-length blots for CD9 shown in Figure 5F.

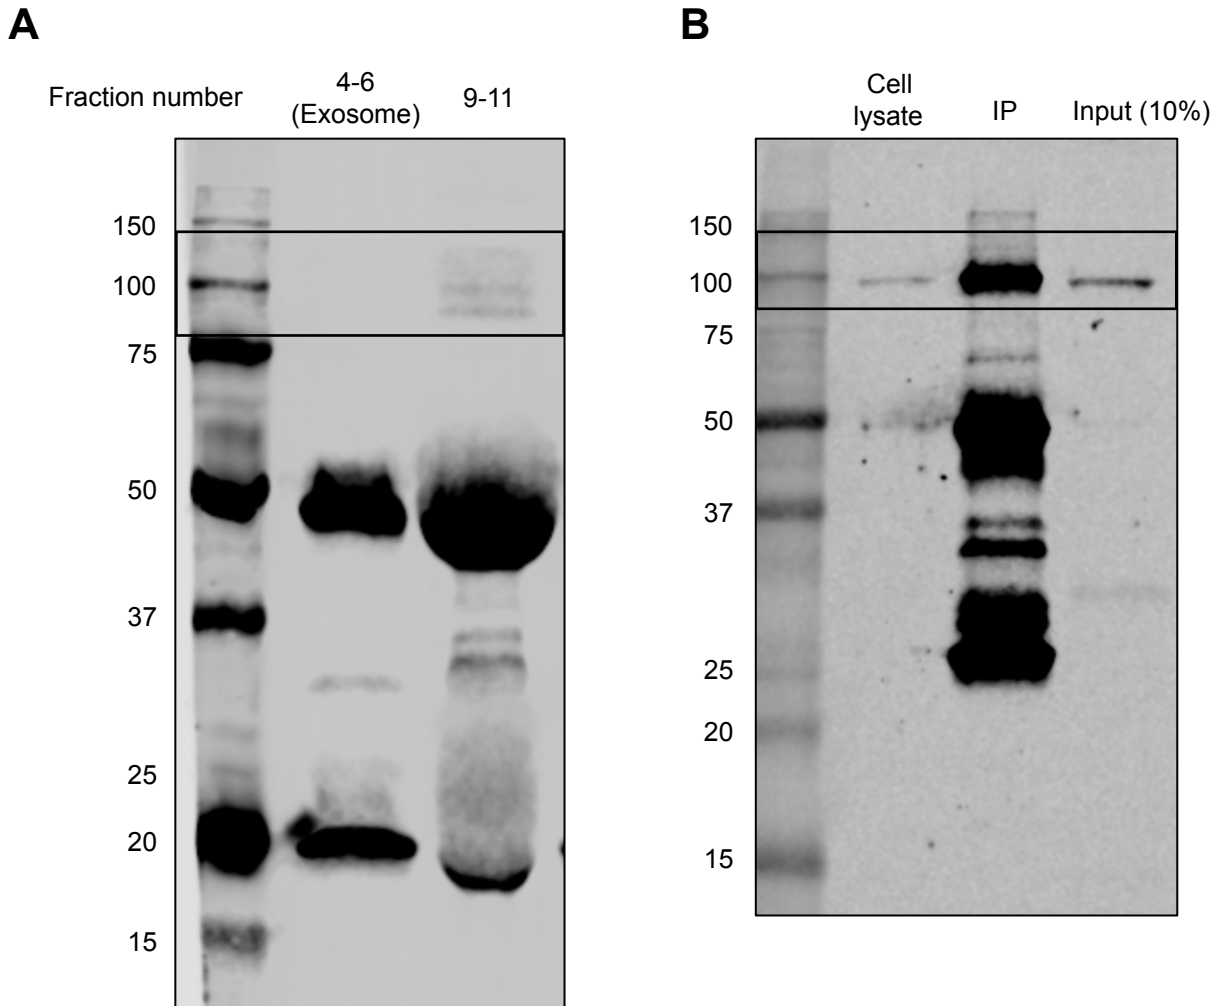

**Supplementary Figure S5. Full-length blots shown in Figure 5G.** (A) Western blotting of fractions collected by EV-second procedure using a serum sample of patient with synovial sarcoma, which were immunoprecipitated (IP) using human anti-Ago2 monoclonal antibody. (B) Western blotting of SYO-1 cell lysate fractions, which were immunoprecipitated using human anti-Ago2 monoclonal antibody.

A

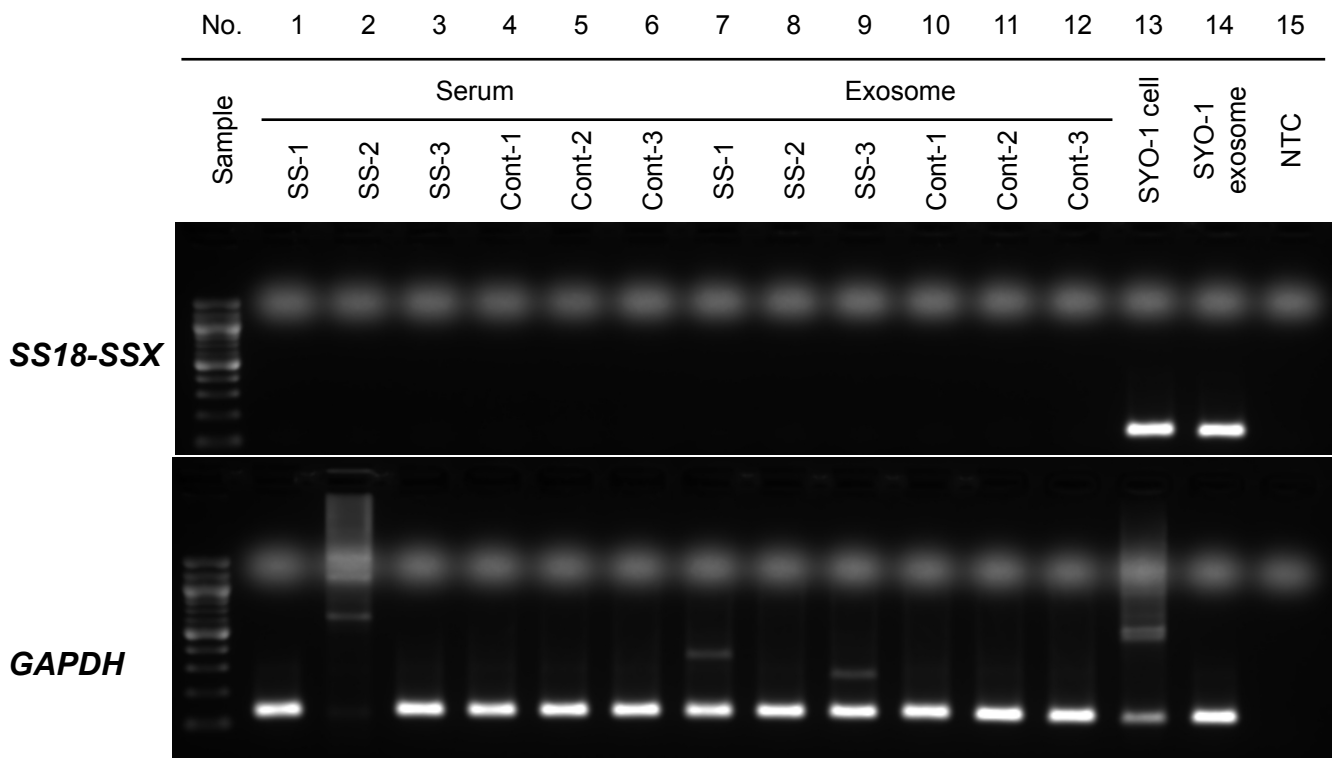

Abbreviation SS=synovial sarcoma, Cont=control

B

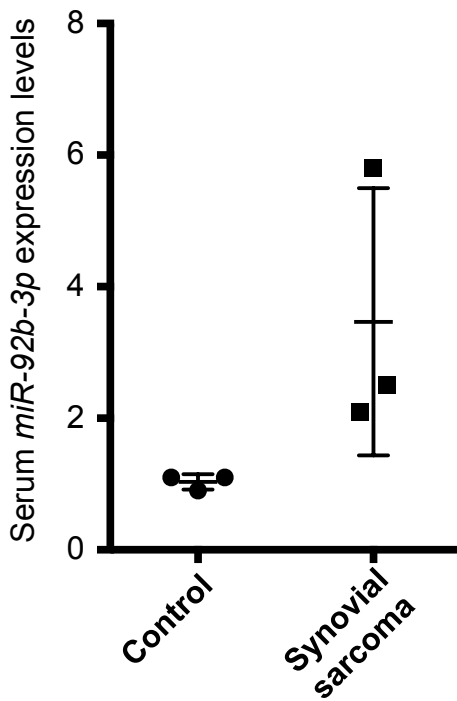

C

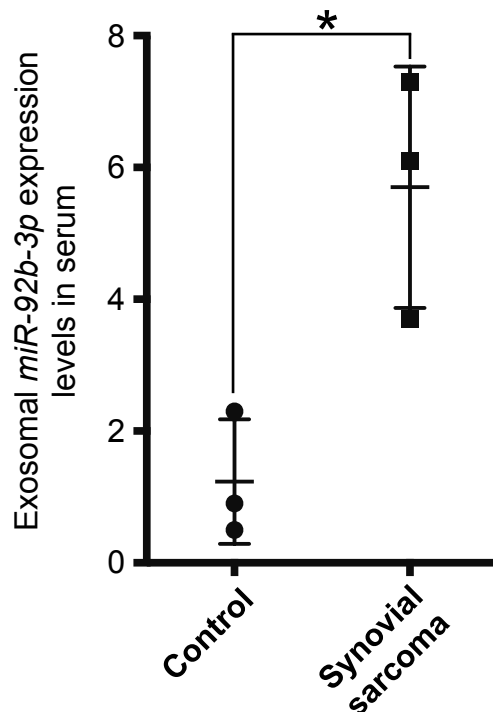

**Supplementary Figure S6. *SS18-SSX* expression in exosomes from SS-patient serum.** (A) *SS18-SSX* fusion gene transcript by polymerase chain reaction (PCR). *SS18-SSX* was not detectable in either the serum or the exosomes of SS patients and controls (each  $n = 3$ ). Cell lysate and exosomes of the SYO-1 SS cell line were used as positive controls. Ct values of each sample are presented in **Supplementary Table S5**. The threshold of PCR of *SS18-SSX* is presented in **Supplementary Table S6**. (B) Serum *miR-92b-3p* expression levels in SS-patient serum analyzed in (A). (C) Serum *miR-92b-3p* expression levels in the exosomes derived from SS-patient serum analyzed in (A). \* $p < 0.05$ ; Student's *t*-test.

**Supplemental Table S1.** Characteristics of patients and healthy individuals in each cohort

| Variables                |                | Screening set                     |                               |                             | Validation set                     |                                |                              |
|--------------------------|----------------|-----------------------------------|-------------------------------|-----------------------------|------------------------------------|--------------------------------|------------------------------|
|                          |                | Synovial sarcoma patients (n = 9) | Benign tumor patients (n = 9) | Healthy individuals (n = 9) | Synovial sarcoma patients (n = 12) | Benign tumor patients (n = 12) | Healthy individuals (n = 12) |
| Age (years) <sup>a</sup> | Median (range) | 28 (21-56)                        | 35 (25-56)                    | 35 (26-58)                  | 43.5 (11-71)                       | 43.5 (11-68)                   | 54.5 (29-79)                 |
| Gender                   | Male           | 3                                 | 3                             | 4                           | 6                                  | 5                              | 5                            |
|                          | Female         | 6                                 | 6                             | 5                           | 6                                  | 7                              | 7                            |

<sup>a</sup>Age at diagnosis



**Supplemental Table S2.** Clinical characteristics of synovial sarcoma patients in each cohort

| Variables                | Discovery cohort<br>(n = 9) | Validation cohort<br>(n = 12) |
|--------------------------|-----------------------------|-------------------------------|
| Age (years) <sup>a</sup> |                             |                               |
| Median (range)           | 28 (21-56)                  | 43.5 (11-71)                  |
| 11-20                    | -                           | 5                             |
| 21+                      | 9                           | 7                             |
| Gender                   |                             |                               |
| Male                     | 3                           | 6                             |
| Female                   | 6                           | 6                             |
| Location                 |                             |                               |
| Extremities, %           | 55.6                        | 66.7                          |
| Body trunks, %           | 44.4                        | 33.3                          |
| Upper limb               | 2                           | -                             |
| Lower limb               | 3                           | 8                             |
| Body trunks              | 4                           | 4                             |
| Size of the lesion, mm   |                             |                               |
| Median (range)           | 9.2 (4-60)                  | 8.5 (4-15)                    |
| Metastasis at diagnosis  |                             |                               |
| Present                  | 2                           | 3                             |
| Absent                   | 7                           | 9                             |
| Histological subtype     |                             |                               |
| Monophasic               | 5                           | 8                             |
| Biphasic                 | 3                           | 4                             |
| Treatment                |                             |                               |
| C+OP                     | 7                           | 10                            |
| C+OP+R                   | 1                           | -                             |
| C+R                      | -                           | 1                             |
| C                        | -                           | 1                             |
| OP                       | 1                           | -                             |
| Neoadjuvant chemotherapy |                             |                               |
| DOX+IFO                  | 8                           | 2                             |
| DOX                      | -                           | 1                             |
| GEM+DOC                  | -                           | 1                             |
| Other                    | -                           | 8                             |
| Disease status           |                             |                               |
| CDF                      | -                           | 6                             |
| NED                      | 6                           | 1                             |
| AWD                      | 2                           | 1                             |
| DOD                      | 1                           | 4                             |

Abbreviations C=chemotherapy, OP=operative surgery, R=radiation, DOX=doxorubicin, IFO=ifosfamide, GEM=gemcitabine, CDF=continuous disease free, NED=no evidence of disease, AWD=alive with disease, DOD=died of disease

<sup>a</sup>Age at diagnosis

**Supplemental Table S3.** Clinical correlation of *miR-92b-3p* and *miR-150-3p* expression levels in serum from synovial sarcoma patients

| Variables                | Serum <i>miR-92b-3p</i> levels<br>mean $\pm$ SD (N = 12) | <i>P</i> | Serum <i>miR-150-3p</i> levels<br>mean $\pm$ SD (N = 12) | <i>P</i> |
|--------------------------|----------------------------------------------------------|----------|----------------------------------------------------------|----------|
| Age (years) <sup>a</sup> |                                                          |          |                                                          |          |
| ≤ 43.5                   | 0.93 $\pm$ 0.99 (n = 6)                                  | 0.093    | 9.8 $\pm$ 7.4 (n = 6)                                    | 0.31     |
| > 43.5                   | 3.8 $\pm$ 4.1 (n = 6)                                    |          | 14 $\pm$ 5.1 (n = 6)                                     |          |
| Gender                   |                                                          |          |                                                          |          |
| Male                     | 1.2 $\pm$ 0.92 (n = 6)                                   | 0.48     | 13 $\pm$ 6.2 (n = 6)                                     | 0.70     |
| Female                   | 3.5 $\pm$ 4.4 (n = 6)                                    |          | 11 $\pm$ 7.0 (n = 6)                                     |          |
| Location                 |                                                          |          |                                                          |          |
| Extremities              | 3.2 $\pm$ 3.8 (n = 8)                                    | 0.15     | 13 $\pm$ 5.0 (n = 8)                                     | 0.28     |
| Trunks                   | 0.77 $\pm$ 0.51 (n = 4)                                  |          | 8.6 $\pm$ 8.5 (n = 4)                                    |          |
| Tumor size, cm           |                                                          |          |                                                          |          |
| ≤ 8.5                    | 1.3 $\pm$ 1.7 (n = 6)                                    | 0.093    | 8.9 $\pm$ 6.7 (n = 6)                                    | 0.13     |
| > 8.5                    | 3.5 $\pm$ 4.1 (n = 6)                                    |          | 15 $\pm$ 4.9 (n = 6)                                     |          |
| Lung metastasis          |                                                          |          |                                                          |          |
| Negative                 | 2.4 $\pm$ 3.6 (n = 9)                                    | 0.73     | 13 $\pm$ 6.7 (n = 9)                                     | 0.60     |
| Positive                 | 2.3 $\pm$ 2.2 (n = 3)                                    |          | 9.8 $\pm$ 6.2 (n = 3)                                    |          |

<sup>a</sup>Age at diagnosis

**Supplementary Table S4.** Patients demographics of the soft tissue sarcomas other than SS

| <b>Case No.</b> | <b>Age (years)<sup>a</sup></b> | <b>Gender</b> | <b>Diagnosis</b>                        |
|-----------------|--------------------------------|---------------|-----------------------------------------|
| #1              | 19                             | F             | Alveolar soft part sarcoma              |
| #2              | 22                             | F             | Alveolar soft part sarcoma              |
| #3              | 52                             | M             | Clear cell sarcoma                      |
| #4              | 73                             | M             | Dedifferentiated liposarcoma            |
| #5              | 62                             | F             | Dedifferentiated liposarcoma            |
| #6              | 64                             | F             | Leiomyosarcoma                          |
| #7              | 57                             | F             | Leiomyosarcoma                          |
| #8              | 29                             | M             | Malignant peripheral nerve sheath tumor |
| #9              | 49                             | F             | Malignant peripheral nerve sheath tumor |
| #10             | 54                             | F             | Malignant peripheral nerve sheath tumor |
| #11             | 60                             | M             | Malignant peripheral nerve sheath tumor |
| #12             | 28                             | F             | Malignant peripheral nerve sheath tumor |
| #13             | 23                             | F             | Malignant peripheral nerve sheath tumor |
| #14             | 55                             | F             | Myxofibrosarcoma                        |
| #15             | 59                             | F             | Myxofibrosarcoma                        |
| #16             | 67                             | M             | Myxofibrosarcoma                        |
| #17             | 49                             | M             | Myxoid liposarcoma                      |
| #18             | 21                             | M             | Myxoid liposarcoma                      |
| #19             | 52                             | F             | Solitary fibrous tumor                  |
| #20             | 23                             | M             | Undifferentiated pleomorphic sarcoma    |
| #21             | 42                             | M             | Undifferentiated pleomorphic sarcoma    |
| #22             | 63                             | F             | Undifferentiated pleomorphic sarcoma    |
| #23             | 73                             | F             | Undifferentiated pleomorphic sarcoma    |
| #24             | 83                             | M             | Undifferentiated pleomorphic sarcoma    |

<sup>a</sup>Age at diagnosis

**Supplementary Table S5.** Ct values of *GAPDH* and *SS18-SSX* for each sample.

| Lane no. | 1     | 2     | 3     | 4      | 5      | 6      | 7       | 8     | 9     | 10     | 11     | 12     | 13         | 14            | 15    |
|----------|-------|-------|-------|--------|--------|--------|---------|-------|-------|--------|--------|--------|------------|---------------|-------|
| Sample   | Serum |       |       |        |        |        | Exosome |       |       |        |        |        | SYO-1 cell | SYO-1 exosome | NTC   |
|          | SS-1  | SS-2  | SS-3  | Cont-1 | Cont-2 | Cont-3 | SS-1    | SS-2  | SS-3  | Cont-1 | Cont-2 | Cont-3 |            |               |       |
| GAPDH    | 34.41 | 33.97 | 33.41 | 32.97  | 34.19  | 33.74  | 36.78   | 35.89 | 33.92 | 34.87  | 35.29  | 35.53  | 23.47      | 29.73         | No Ct |
| SS18-SSX | No Ct | No Ct | No Ct | No Ct  | No Ct  | No Ct  | No Ct   | No Ct | No Ct | No Ct  | No Ct  | No Ct  | 28.65      | 35.57         | No Ct |

Abbreviation SS=synovial sarcoma, Cont=control

**Supplementary Table S6.** Threshold for detecting **SS18-SSX** by PCR

| Amount of RNA of<br>SYO-1 SS cells | <i>GAPDH</i> | <i>SS18-SSX</i> |
|------------------------------------|--------------|-----------------|
| 1 pg                               | 56.98        | No Ct           |
| 10 pg                              | 53.72        | No Ct           |
| 100 pg                             | 44.99        | 49.54           |
| 1 ng                               | 39.43        | 43.9            |
| 10 ng                              | 34.66        | 38.94           |
| 100 ng                             | 29.5         | 33.97           |
| 500 ng                             | 26.11        | 30.66           |
| NTC                                | 54.98        | No Ct           |

**Supplementary Table S7.** Summary of miRNA dysregulations in synovial sarcoma cells and tissues that have been previously reported

| Upregulated miRNAs in synovial sarcoma cells/tissues             |                                                                                                                          |                                                  |
|------------------------------------------------------------------|--------------------------------------------------------------------------------------------------------------------------|--------------------------------------------------|
| <i>miR-9-5p</i> <sup>21</sup>                                    | <i>miR-193a-5p</i> <sup>23</sup>                                                                                         | <i>miR-379</i> <sup>23</sup>                     |
| <i>miR-17-5p</i> <sup>24,26</sup>                                | <i>miR-199a</i> <sup>24</sup> - <i>3p</i> <sup>21, 23</sup><br><i>miR-199b-3p</i> <sup>21</sup>                          | <i>miR-381</i> <sup>23</sup>                     |
| <i>miR-96</i> <sup>22</sup>                                      | <i>miR-200a</i> <sup>22</sup> , <i>b</i> <sup>22,24</sup> - <i>3p</i> <sup>21</sup><br><i>miR-200c</i> <sup>21, 24</sup> | <i>miR-429</i> <sup>22</sup>                     |
| <i>miR-98</i> <sup>23</sup>                                      | <i>miR-203</i> <sup>22</sup>                                                                                             | <i>miR-411</i> <sup>23</sup>                     |
| <i>miR-99a, b</i> <sup>23</sup>                                  | <i>miR-214</i> <sup>23, 24</sup>                                                                                         | <i>miR-495</i> <sup>22</sup>                     |
| <i>miR-125a-3p, b1, 2</i> <sup>23</sup>                          | <i>miR-299-39</i> <sup>23</sup>                                                                                          | <i>miR-574-3p</i> <sup>23</sup>                  |
| <i>miR-127</i> <sup>18</sup> - <i>3p</i> <sup>23</sup>           | <i>miR-337-5p</i> <sup>23</sup>                                                                                          | <i>miR-668</i> <sup>22</sup>                     |
| <i>miR-141</i> <sup>24</sup>                                     | <i>miR-368</i> <sup>24</sup>                                                                                             | <i>miR-874</i> <sup>23</sup>                     |
| <i>miR-182</i> <sup>22</sup>                                     | <i>miR-375</i> <sup>22</sup>                                                                                             | <i>miR-1468</i> <sup>22</sup>                    |
| <i>miR-183</i> <sup>22, 24, 25</sup>                             | <i>miR-376a</i> <sup>23,24</sup> - <i>3p</i> <sup>21</sup><br><i>miR-376c</i> <sup>21, 23</sup>                          | <i>let-7e, f</i> <sup>23</sup>                   |
| Downregulated miRNAs in synovial sarcoma cells/tissues           |                                                                                                                          |                                                  |
| <i>miR-15b</i> <sup>24</sup>                                     | <i>miR-145</i> <sup>22, 24</sup> - <i>5p</i> <sup>21</sup>                                                               | <i>miR-542-3p</i> <sup>16, 5p<sup>22</sup></sup> |
| <i>miR-18b</i> <sup>23</sup>                                     | <i>miR-146b</i> <sup>24</sup>                                                                                            | <i>miR-548j</i> <sup>22</sup>                    |
| <i>miR-20a</i> <sup>23, b<sup>24</sup></sup>                     | <i>miR-150-5p</i> <sup>21</sup>                                                                                          | <i>miR-550</i> <sup>22</sup>                     |
| <i>miR-21</i> <sup>21, 24</sup>                                  | <i>miR-221</i> <sup>22</sup>                                                                                             | <i>miR-612</i> <sup>23</sup>                     |
| <i>miR-23a, b</i> <sup>24</sup>                                  | <i>miR-222</i> <sup>22, 24</sup>                                                                                         | <i>miR-618</i> <sup>22</sup>                     |
| <i>miR-24</i> <sup>24</sup>                                      | <i>miR-223</i> <sup>21, 24</sup>                                                                                         | <i>miR-636</i> <sup>23</sup>                     |
| <i>miR-27a, b</i> <sup>24</sup>                                  | <i>miR-335</i> <sup>24</sup>                                                                                             | <i>miR-638</i> <sup>23</sup>                     |
| <i>miR-29a, b, c</i> <sup>24</sup>                               | <i>miR-338-5p</i> <sup>22</sup>                                                                                          | <i>miR-663</i> <sup>23</sup>                     |
| <i>miR-30a-5p, d, e-5p</i> <sup>24</sup>                         | <i>miR-339-5p</i> <sup>22</sup>                                                                                          | <i>miR-675</i> <sup>23</sup>                     |
| <i>miR-34b</i> <sup>22, c-3p<sup>22, 5p<sup>22</sup></sup></sup> | <i>miR-346</i> <sup>23</sup>                                                                                             | <i>miR-1225-3p</i> <sup>23</sup>                 |
| <i>miR-106a</i> <sup>24</sup>                                    | <i>miR-378a-3p, i, g</i> <sup>21</sup>                                                                                   | <i>miR-1226</i> <sup>23</sup>                    |
| <i>miR-126</i> <sup>18</sup>                                     | <i>miR-424</i> <sup>22, 24</sup>                                                                                         | <i>miR-1233</i> <sup>23</sup>                    |
| <i>miR-133b</i> <sup>21</sup>                                    | <i>miR-450a</i> <sup>22</sup>                                                                                            | <i>miR-1234</i> <sup>23</sup>                    |
| <i>miR-139-3p</i> <sup>23</sup>                                  | <i>miR-451</i> <sup>24</sup>                                                                                             | <i>let-7a</i> <sup>23, F<sup>24</sup></sup>      |
| <i>miR-142-3p</i> <sup>22, -5p<sup>22</sup></sup>                | <i>miR-503</i> <sup>22</sup>                                                                                             |                                                  |
| <i>miR-143</i> <sup>24</sup>                                     | <i>miR-511</i> <sup>22</sup>                                                                                             |                                                  |
